# Supplementary material for: Post-transcriptional regulation of 5'-untranslated regions of human Transient Receptor Potential Vanilloid type-1 (TRPV-1) channels: role in the survival of glioma patients
Source: PubMed Central journal article supplement (PMC5348411; doi:10.18632/oncotarget.13132), 2016-11-05
Supplement: oncotarget-07-81541-s001.pdf [file oncotarget-07-81541-s001.pdf]

## Post-transcriptional regulation of 5'-untranslated regions of human Transient Receptor Potential Vanilloid type-1 (TRPV-1) channels: role in the survival of glioma patients

### SUPPLEMENTARY TABLES

Supplementary Table S1: Primer sequences for TRPV1 5'UTR variants amplification

| TRPV1 splice variant | Forward primer             | Reverse primer               |
|----------------------|----------------------------|------------------------------|
| TRPV1 <sub>v0</sub>  | 5'-TGCCTGCGTCTAGCTGGTT-3'  | 5'-CTGTGCTGCTCCATTTCTTCAT-3' |
| TRPV1 <sub>v1</sub>  | 5'-CACAATCCCGGCTGCTTCCT-3' | 5'-CGGCGTTGCCTTTTCCT-3'      |
| TRPV1 <sub>v3</sub>  | 5'-TCACCGAGATCCTCCCTGAA-3' | 5'-CCCCACACAGAACAAGGAAAA-3'  |
| TRPV1 <sub>v4</sub>  | 5'-CACAATCCCGGCTGCTTCCT-3' | 5'-CGGCGTTGCCTTTTCCA-3'      |

**Supplementary Table S2: 5'UTR length indicated as number of nucleotides (nt), for each TRPV1 variant**

| <b>TRPV1 5'UTR variant</b> | <b>5' UTR length (nt)</b> |
|----------------------------|---------------------------|
| V <sub>0</sub>             | 158                       |
| V <sub>1</sub>             | 275                       |
| V <sub>3</sub>             | 527                       |
| V <sub>4</sub>             | 201                       |

**Supplementary Table S3: Clinicopathological characteristics of 44 GBM patients analysed for TRPV1 5'UTR variant mRNA expression**

| <b>Patient characteristics</b> |    |
|--------------------------------|----|
| n° of samples                  | 44 |
| Sex                            |    |
| Male (%)                       | 24 |
| Female (%)                     | 20 |
| Age (Years)                    |    |
| < 45                           | 34 |
| >45                            | 50 |
